# Supplementary material for: Treatment of indium-tin-oxide etching wastewater and recovery of In, Mo, Sn and Cu by liquid–liquid extraction and wet chemical reduction: a laboratory scale sustainable commercial green process
Source: Royal Society of Chemistry journal article supplement (doi:10.1039/c5gc01244a), 2015-01-01
Supplement: c5gc01244a1.pdf [file c5gc01244a1.pdf]

### SUPPLEMENTARY INFORMATIONS

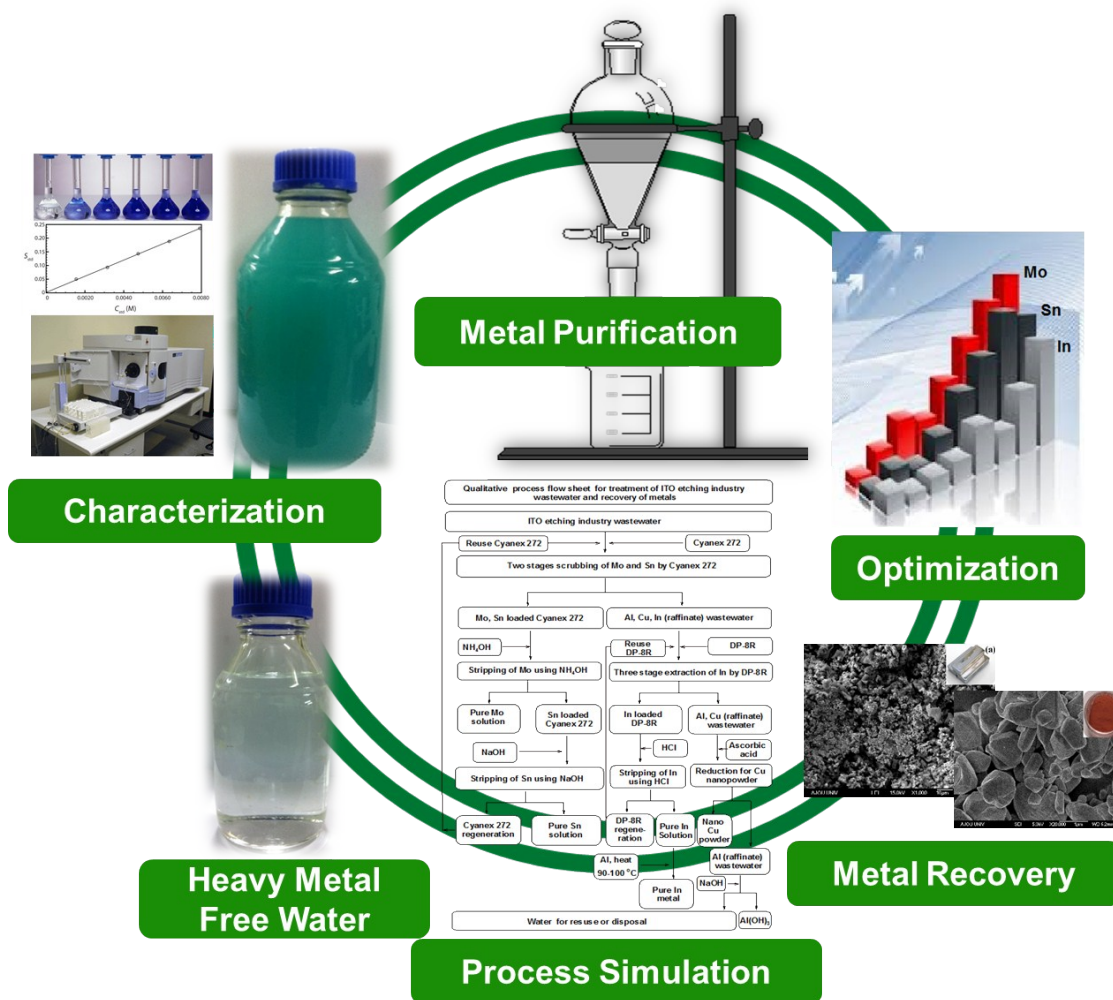

ESI Fig.1: Schematics of the total laboratory scale sustainable commercial green process development.

ESI Table 1: Comparison of metal concentrations those are analysed by both by the Calibration Curve Method and Standard Addition Method. All values are averaged over three sets of analysis.

|                          | Cu, mg/L | In, mg/L | Sn, mg/L | Mo, mg/L | Al, mg/L |
|--------------------------|----------|----------|----------|----------|----------|
| Calibration Curve Method | 6112.62  | 1805.91  | 51.3621  | 621.15   | 1352.87  |
| Standard Addition Method | 6118.82  | 1815.15  | 53.3432  | 626.81   | 1358.98  |
